# Supplementary material
Source: PubMed Central journal article supplement (PMC2704921)
Supplement: NIHMS101409-supplement-Supp_Data.pdf [file NIHMS101409-supplement-Supp_Data.pdf]

Supplemental Material

for

**Polarizable Empirical Force Field for Nitrogen-  
containing Heteroaromatic Compounds Based on the  
Classical Drude Oscillator**

*Pedro E. M. Lopes<sup>1</sup>, Guillaume Lamoureux<sup>2</sup>  
and Alexander D. MacKerell, Jr.<sup>1,\*</sup>*

Table S1) Comparison of equilibrium geometries from polarizable CHARMM and experiment.

| <b>Pyridine</b>   |             |                         |       |                                   |        |        |
|-------------------|-------------|-------------------------|-------|-----------------------------------|--------|--------|
|                   | CSD         | PYRDNA01 <sup>1</sup>   | QM    | Microwave <sup>2</sup>            | Target | DRUDE  |
| 1-2               | 1.366±0.021 | 1.376                   | 1.392 | 1.392                             | 1.382  | 1.404  |
| 2-3               | 1.373±0.019 | 1.383                   | 1.393 | 1.394                             | 1.386  | 1.403  |
| 3-4               | 1.333±0.020 | 1.338                   | 1.343 | 1.338                             | 1.338  | 1.359  |
| 6-1-2             | 119.0±0.06  | 118.8                   | 119.9 | 118.4                             | 118.9  | 118.5  |
| 1-2-3             | 118.9±0.07  | 118.5                   | 117.7 | 118.5                             | 118.4  | 118.6  |
| 2-3-4             | 122.8±0.09  | 123.8                   | 124.0 | 123.8                             | 123.6  | 123.7  |
| 3-4-5             | 117.5±0.12  | 116.5                   | 116.2 | 116.9                             | 116.8  | 116.8  |
| <b>Pyrimidine</b> |             |                         |       |                                   |        |        |
|                   | CSD         | PRMDIN01 <sup>3</sup>   | QM    | Electron Diffraction <sup>4</sup> | Target | DRUDE  |
| 1-2               | 1.374±0.01  | 1.387                   | 1.393 | 1.393                             | 1.387  | 1.398  |
| 2-3               | 1.337±0.01  | 1.339                   | 1.344 | 1.340                             | 1.340  | 1.341  |
| 3-4               | 1.324±0.01  | 1.337                   | 1.342 | 1.340                             | 1.336  | 1.342  |
| 6-1-2             | 116.6±0.4   | 116.5                   | 116.9 | 116.8                             | 116.7  | 116.1  |
| 1-2-3             | 122.6±0.6   | 122.6                   | 122.3 | 122.3                             | 122.5  | 122.6  |
| 2-3-4             | 117.6±0.9   | 115.9                   | 115.5 | 115.5                             | 116.1  | 115.8  |
| 3-4-5             | 126.8±1.0   | 126.7                   | 127.5 | 127.6                             | 127.2  | 127.0  |
| <b>Pyrrole</b>    |             |                         |       |                                   |        |        |
|                   | CSD         | RUVQII <sup>5</sup>     | QM    | Microwave <sup>6</sup>            | Target | DRUDE  |
| 5-1               | 1.425±0.032 | 1.423                   | 1.423 | 1.417                             | 1.421  | 1.423  |
| 1-2               | 1.362±0.030 | 1.357                   | 1.383 | 1.382                             | 1.374  | 1.363  |
| 2-3               | 1.383±0.029 | 1.364                   | 1.373 | 1.370                             | 1.369  | 1.382  |
| 5-1-2             | 107.6±1.2   | 107.0                   | 107.5 | 107.4                             | 107.3  | 107.5  |
| 1-2-3             | 108.3±1.1   | 108.6                   | 107.4 | 107.4                             | 107.8  | 108.2  |
| 2-3-4             | 108.0±1.4   | 108.8                   | 110.1 | 109.8                             | 109.6  | 108.6  |
| <b>Imidazole</b>  |             |                         |       |                                   |        |        |
|                   | CSD         | IMAZOL13 <sup>7,8</sup> | QM    | Microwave <sup>9</sup>            | Target | DRUDE  |
| 5-1               | 1.360±0.028 | 1.363                   | 1.375 | 1.369                             | 1.367  | 1.377  |
| 1-2               | 1.339±0.021 | 1.358                   | 1.378 | 1.358                             | 1.358  | 1.359  |
| 2-3               | 1.356±0.021 | 1.368                   | 1.377 | 1.378                             | 1.367  | 1.375  |
| 3-4               | 1.312±0.014 | 1.316                   | 1.326 | 1.326                             | 1.319  | 1.304  |
| 4-5               | 1.330±0.013 | 1.337                   | 1.366 | 1.349                             | 1.346  | 1.357  |
| 5-1-2             | 106.30±0.74 | 106.08                  | 104.9 | 106.3                             | 105.9  | 105.41 |
| 1-2-3             | 110.06±0.84 | 109.86                  | 111.1 | 109.8                             | 110.2  | 109.89 |
| 2-3-4             | 105.20±1.52 | 105.05                  | 104.9 | 105.4                             | 105.2  | 104.55 |
| 3-4-5             | 111.64±1.03 | 112.02                  | 111.6 | 111.3                             | 111.6  | 113.00 |
| 4-5-1             | 106.75±1.14 | 107.00                  | 107.6 | 107.2                             | 107.1  | 106.60 |

Table S2a. Vibrational analysis of pyridine.

|    | Drude  |         |       |         |      | MP2/6-31G* |         |       |         |      |
|----|--------|---------|-------|---------|------|------------|---------|-------|---------|------|
|    | Freq   | PED     | %     | PED     | %    | Freq       | PED     | %     | PED     | %    |
| 1  | 355.6  | asytor  | 70.0  | asytor' | 27.0 | 356.5      | asytor  | 60.0  | asytor' | 26.0 |
| 2  | 380.3  | asytor' | 57.0  | asytor  | 22.0 | 380.1      | asytor' | 60.0  | asytor  | 25.0 |
| 3  | 577.0  | wagCH   | 49.0  | puck    | 43.0 | 576.3      | asydef' | 69.0  | asydef  | 23.0 |
| 4  | 630.5  | asydef' | 59.0  | asydef  | 20.0 | 629.6      | asydef  | 67.0  | asydef' | 24.0 |
| 5  | 656.2  | wagCH   | 71.0  | puck    | 26.0 | 635.8      | puck    | 83.0  | wagCH   | 16.0 |
| 6  | 718.6  | asydef  | 60.0  | asydef' | 20.0 | 691.8      | wagCH   | 89.0  |         |      |
| 7  | 750.6  | wagCH   | 100.0 |         |      | 835.0      | wagCH   | 101.0 |         |      |
| 8  | 863.2  | wagCH   | 99.0  |         |      | 872.8      | wagCH   | 95.0  |         |      |
| 9  | 863.6  | tridef  | 85.0  |         |      | 877.8      | wagCH   | 86.0  |         |      |
| 10 | 916.4  | wagCH   | 97.0  |         |      | 898.6      | wagCH   | 86.0  | asytor  | 16.0 |
| 11 | 956.5  | wagCH   | 79.0  |         |      | 957.1      | tridef  | 42.0  | bondCN  | 32.0 |
| 12 | 983.4  | bondCC  | 68.0  | rockCH  | 23.0 | 996.8      | bondCC  | 49.0  | tridef  | 44.0 |
| 13 | 997.1  | bondCC  | 70.0  | rockCH  | 21.0 | 1037.6     | bondCC  | 59.0  | rockCH  | 33.0 |
| 14 | 1059.4 | bondCN  | 46.0  | bondCC  | 39.0 | 1048.7     | rockCH  | 35.0  | bondCC  | 31.0 |
| 15 | 1177.8 | rockCH  | 73.0  | bondCC  | 21.0 | 1136.9     | rockCH  | 85.0  | bondCC  | 15.0 |
| 16 | 1193.4 | rockCH  | 64.0  | bondCN  | 21.0 | 1197.1     | rockCH  | 66.0  | bondCN  | 22.0 |
| 17 | 1364.1 | rockCH  | 56.0  | bondCN  | 39.0 | 1323.1     | rockCH  | 47.0  | bondCN  | 40.0 |
| 18 | 1408.5 | rockCH  | 86.0  |         |      | 1332.0     | rockCH  | 56.0  | bondCN  | 24.0 |
| 19 | 1461.4 | bondCC  | 65.0  | rockCH  | 27.0 | 1413.9     | rockCH  | 58.0  | bondCC  | 36.0 |
| 20 | 1463.1 | rockCH  | 54.0  | bondCC  | 36.0 | 1448.8     | rockCH  | 70.0  | bondCN  | 15.0 |
| 21 | 1581.1 | rockCH  | 37.0  | bondCN  | 35.0 | 1555.0     | bondCC  | 51.0  | bondCN  | 21.0 |
| 22 | 1582.2 | rockCH  | 51.0  | bondCC  | 25.0 | 1564.0     | bondCC  | 63.0  | rockCH  | 20.0 |
| 23 | 3052.0 | bondCH  | 100.0 |         |      | 3035.1     | bondCH  | 100.0 |         |      |
| 24 | 3054.2 | bondCH  | 100.0 |         |      | 3036.2     | bondCH  | 100.0 |         |      |
| 25 | 3056.8 | bondCH  | 100.0 |         |      | 3051.6     | bondCH  | 100.0 |         |      |
| 26 | 3068.4 | bondCH  | 100.0 |         |      | 3067.4     | bondCH  | 99.0  |         |      |
| 27 | 3070.3 | bondCH  | 100.0 |         |      | 3073.2     | bondCH  | 99.0  |         |      |

Table S2b. Vibrational analysis of pyrimidine

|    | Drude  |         |       |         |      | MP2/6-31G* |         |       |         |      |
|----|--------|---------|-------|---------|------|------------|---------|-------|---------|------|
|    | Freq   | PED     | %     | PED     | %    | Freq       | PED     | %     | PED     | %    |
| 1  | 388.5  | asytor' | 55.0  | asytor  | 26.0 | 329.2      | asytor' | 82.0  |         |      |
| 2  | 412.8  | asytor  | 74.0  | asytor' | 27.0 | 383.1      | asytor  | 85.0  |         |      |
| 3  | 590.7  | puck    | 79.0  |         |      | 593.1      | asydef  | 70.0  | asydef' | 23.0 |
| 4  | 650.4  | asydef' | 62.0  | asydef' | 21.0 | 653.6      | asydef' | 68.0  | asydef  | 23.0 |
| 5  | 728.9  | asydef' | 43.0  | tridef  | 20.0 | 691.5      | puck    | 59.0  | wagCH3  | 16.0 |
| 6  | 755.9  | wagCH1  | 56.0  | wagCH4  | 15.0 | 764.1      | wagCH1  | 44.0  | puck    | 30.0 |
| 7  | 870.7  | tridef  | 66.0  | bondCN  | 17.0 | 887.3      | wagCH1  | 46.0  | wagCH3  | 17.0 |
| 8  | 902.6  | wagCH2  | 52.0  | wagCH4  | 49.0 | 921.4      | wagCH2  | 47.0  | wagCH4  | 42.0 |
| 9  | 928.5  | wagCH3  | 83.0  |         |      | 933.7      | wagCH3  | 58.0  | asytor' | 16.0 |
| 10 | 998.9  | bondCN  | 48.0  | rockCH  | 29.0 | 957.1      | tridef  | 40.0  | bondCN' | 26.0 |
| 11 | 1012.8 | wagCH4  | 30.0  | wagCH2  | 23.0 | 1028.4     | tridef  | 43.0  | bondCC  | 41.0 |
| 12 | 1042.0 | bondCC  | 63.0  | bondCN' | 21.0 | 1049.5     | rockCH  | 45.0  | bondCN  | 31.0 |
| 13 | 1105.5 | bondCN  | 50.0  | bondCN' | 27.0 | 1108.8     | bondCN' | 32.0  | bondCC  | 22.0 |
| 14 | 1170.3 | rockCH  | 75.0  |         |      | 1192.6     | rockCH  | 57.0  | bondCN  | 27.0 |
| 15 | 1302.3 | bondCN' | 35.0  | rockCH  | 28.0 | 1267.1     | bondCN' | 56.0  | bondCN  | 28.0 |
| 16 | 1304.5 | rockCH  | 73.0  | bondCN  | 20.0 | 1340.9     | rockCH  | 98.0  |         |      |
| 17 | 1452.1 | rockCH  | 61.0  | bondCC  | 31.0 | 1376.1     | rockCH  | 48.0  | bondCN' | 29.0 |
| 18 | 1528.8 | bondCC  | 36.0  | rockCH  | 33.0 | 1432.4     | rockCH  | 74.0  |         |      |
| 19 | 1574.4 | bondCN' | 65.0  | rockCH  | 28.0 | 1542.0     | bondCN  | 43.0  | rockCH  | 24.0 |
| 20 | 1592.1 | rockCH  | 55.0  | bondCC  | 20.0 | 1549.8     | bondCC  | 52.0  | bondCN' | 22.0 |
| 21 | 2977.3 | bondCH  | 100.0 |         |      | 3040.7     | bondCH  | 100.0 |         |      |
| 22 | 3051.4 | bondCH  | 100.0 |         |      | 3043.7     | bondCH  | 100.0 |         |      |
| 23 | 3053.2 | bondCH  | 100.0 |         |      | 3055.3     | bondCH  | 100.0 |         |      |
| 24 | 3055.1 | bondCH  | 100.0 |         |      | 3083.2     | bondCH  | 99.0  |         |      |

Table S2c. Vibrational analysis of imidazole

|    | Drude  |         |      |         |     | MP2/6-31G* |         |       |         |      |
|----|--------|---------|------|---------|-----|------------|---------|-------|---------|------|
|    | Freq   | PED     | %    | PED     | %   | Freq       | PED     | %     | PED     | %    |
| 1  | 480.0  | wagNH   | 93.  |         |     | 489.2      | wagNH   | 60.0  | torsio  | 36.0 |
| 2  | 615.8  | wagCH'  | 55.  | wagCH   | 28. | 600.2      | torsio' | 74.0  | wagNH   | 18.0 |
| 3  | 673.2  | torsio' | 52.  | wagCH   | 39. | 644.0      | torsio  | 43.0  | wagCH   | 33.0 |
| 4  | 693.7  | wagCH   | 69.  | wagCH'  | 21. | 649.3      | wagCH   | 62.0  | wagCH'  | 16.0 |
| 5  | 822.4  | torsio  | 70.  | wagCH'  | 21. | 722.3      | wagCH'  | 83.0  |         |      |
| 6  | 883.0  | rngdef  | 47.  | rngdef' | 23. | 766.4      | wagCH   | 94.0  |         |      |
| 7  | 889.5  | rngdef' | 47.  | rngdef  | 23. | 852.5      | rngdef  | 78.0  |         |      |
| 8  | 948.8  | wagCH   | 63.  | torsio' | 37. | 890.2      | rngdef' | 76.0  |         |      |
| 9  | 1012.4 | bondCN  | 57.  | bondCN' | 29. | 1042.6     | rockCH  | 35.0  | bondCN' | 28.0 |
| 10 | 1033.4 | rockCH' | 34.  | bondCN' | 33. | 1064.2     | rockCH  | 26.0  | rockNH  | 23.0 |
| 11 | 1077.3 | rockCH  | 67.  | bondCC  | 24. | 1110.8     | bondCN' | 32.0  | rockCH  | 25.0 |
| 12 | 1160.4 | rockCH' | 36.  | rockCH  | 33. | 1131.4     | bondCN  | 56.0  | bondCN' | 31.0 |
| 13 | 1245.1 | rockCH  | 28.  | rockNH  | 24. | 1226.9     | rockCH' | 47.0  | rockCH  | 30.0 |
| 14 | 1458.5 | bondCN  | 31.  | rockCH  | 24. | 1319.2     | bondCN  | 49.0  | rockCH  | 32.0 |
| 15 | 1502.8 | bondCN  | 36.  | rockNH  | 20. | 1409.5     | bondCN' | 52.0  | rockNH  | 27.0 |
| 16 | 1579.5 | bondCN' | 22.  | bondCN  | 21. | 1447.8     | bondCN  | 26.0  | rockCH' | 24.0 |
| 17 | 1590.0 | bondCN' | 35.  | bondCC  | 25. | 1478.5     | bondCC  | 42.0  | rockCH  | 20.0 |
| 18 | 3058.1 | bondCH' | 99.  |         |     | 3120.4     | bondCH  | 96.0  |         |      |
| 19 | 3158.5 | bondCH  | 100. |         |     | 3123.8     | bondCH' | 95.0  |         |      |
| 20 | 3164.8 | bondCH  | 99.  |         |     | 3145.4     | bondCH  | 98.0  |         |      |
| 21 | 3518.3 | bondNH  | 100. |         |     | 3462.8     | bondNH  | 100.0 |         |      |

Table S2d. Vibrational analysis of pyrrole

|    | Drude |        |         |      |         | MP2/6-31G* |         |       |         |      |
|----|-------|--------|---------|------|---------|------------|---------|-------|---------|------|
|    | Freq  | PED    | %       | PED  | %       | Freq       | PED     | %     | PED     | %    |
| 1  | 1     | 429.2  | wagNH   | 94.  |         | 433.3      | wagNH   | 68.0  | torsio  | 21.0 |
| 2  | 2     | 552.2  | torsio' | 34.  | wagCH   | 552.6      | torsio' | 77.0  |         |      |
| 3  | 3     | 595.7  | wagCH'  | 121. |         | 596.6      | wagCH   | 76.0  |         |      |
| 4  | 4     | 599.9  | wagCH   | 70.  | torsio  | 600.4      | torsio  | 73.0  | wagNH   | 25.0 |
| 5  | 5     | 668.7  | wagCH   | 82.  |         | 666.6      | wagCH'  | 60.0  | wagCH   | 44.0 |
| 6  | 6     | 720.9  | wagCH'  | 59.  | torsio' | 727.6      | wagCH   | 57.0  | wagCH'  | 35.0 |
| 7  | 7     | 743.5  | torsio  | 66.  | wagCH   | 743.5      | wagCH'  | 70.0  | wagCH   | 23.0 |
| 8  | 8     | 829.4  | rngdef  | 85.  |         | 829.1      | rngdef  | 91.0  |         |      |
| 9  | 9     | 850.6  | rngdef' | 71.  |         | 850.7      | rngdef' | 84.0  |         |      |
| 10 | 10    | 997.4  | bondCC  | 34.  | rockCH' | 1009.2     | bondCC' | 26.0  | rockCH  | 25.0 |
| 11 | 11    | 999.7  | rockCH' | 33.  | rockCH  | 1032.1     | bondCC  | 33.0  | rockCH' | 25.0 |
| 12 | 12    | 1045.7 | rockCH  | 37.  | rockCH' | 1069.8     | rockCH' | 30.0  | rockCH  | 30.0 |
| 13 | 13    | 1051.6 | bondCC  | 43.  |         | 1125.7     | bondCC  | 35.0  | bondCN  | 32.0 |
| 14 | 14    | 1130.6 | rockCH  | 35.  | rockCH' | 1130.5     | rockNH  | 35.0  | bondCN  | 24.0 |
| 15 | 15    | 1263.6 | rockNH  | 26.  | rockCH  | 1260.6     | rockCH  | 41.0  | rockCH' | 41.0 |
| 16 | 16    | 1386.7 | bondCC' | 49.  |         | 1386.7     | bondCC' | 41.0  | bondCC  | 24.0 |
| 17 | 17    | 1433.1 | bondCC  | 50.  |         | 1433.1     | bondCN  | 60.0  | rockNH  | 32.0 |
| 18 | 18    | 1480.0 | bondCC  | 36.  | rngdef' | 1451.8     | bondCC  | 29.0  | rockCH' | 23.0 |
| 19 | 19    | 1538.9 | bondCN  | 57.  | rockNH  | 1507.5     | bondCC  | 59.0  |         |      |
| 20 | 20    | 3178.9 | bondCH  | 99.  |         | 3105.5     | bondCH' | 84.0  |         |      |
| 21 | 21    | 3181.1 | bondCH  | 99.  |         | 3115.3     | bondCH' | 62.0  | bondCH  | 37.0 |
| 22 | 22    | 3215.5 | bondCH' | 100. |         | 3128.5     | bondCH  | 83.0  |         |      |
| 23 | 23    | 3221.3 | bondCH' | 99.  |         | 3133.8     | bondCH  | 62.0  | bondCH' | 37.0 |
| 24 | 24    | 3515.0 | bondNH  | 100. |         | 3476.6     | bondNH  | 100.0 |         |      |

Table S3. Rare gas-model compounds minimum interaction energy distances and energies.

| Geom       | Helium            |              |                   |              | Neon              |              |                   |              |
|------------|-------------------|--------------|-------------------|--------------|-------------------|--------------|-------------------|--------------|
|            | Drude             |              | QM                |              | Drude             |              | QM                |              |
|            | Energy (kcal/mol) | Distance (Å) |
| Pyridine   |                   |              |                   |              |                   |              |                   |              |
| 1          | -0.210            | 3.250        | -0.196            | 3.344        | -0.427            | 3.300        | -0.693            | 3.380        |
| 2          | -0.207            | 3.270        | -0.172            | 3.440        | -0.422            | 3.330        | -0.697            | 3.380        |
| 3          | -0.193            | 3.340        | -0.149            | 3.621        | -0.392            | 3.380        | -0.646            | 3.460        |
| 4          | -0.144            | 2.300        | -0.109            | 2.914        | -0.294            | 2.300        | -0.546            | 2.760        |
| 5          | -0.122            | 2.410        | -0.116            | 2.856        | -0.245            | 2.460        | -0.576            | 2.740        |
| Pyrimidine |                   |              |                   |              |                   |              |                   |              |
| 1          | -0.220            | 3.250        | -0.207            | 3.280        | -0.449            | 3.300        | -0.754            | 3.290        |
| 2          | -0.214            | 3.260        | -0.160            | 3.420        | -0.435            | 3.310        | -0.697            | 3.358        |
| 3          | -0.202            | 3.300        | -0.207            | 3.600        | -0.411            | 3.350        | -0.651            | 3.422        |
| 4          | -0.140            | 2.400        | -0.120            | 2.700        | -0.293            | 2.400        | -0.529            | 2.751        |
| 5          | -0.140            | 2.400        | -0.117            | 2.740        | -0.293            | 2.400        | -0.547            | 2.748        |
| 6          | -0.124            | 2.400        | -0.124            | 2.720        | -0.250            | 2.450        | -0.574            | 2.720        |
| 7          | -0.224            | 3.220        | -0.181            | 3.350        | -0.454            | 3.260        | -0.688            | 3.358        |
| Imidazole  |                   |              |                   |              |                   |              |                   |              |
| 1          | -0.202            | 3.270        | -0.196            | 3.344        | -0.410            | 3.330        | -0.693            | 3.380        |
| 2          | -0.197            | 3.300        | -0.172            | 3.440        | -0.400            | 3.350        | -0.697            | 3.380        |
| 3          | -0.174            | 3.380        | -0.149            | 3.621        | -0.355            | 3.430        | -0.646            | 3.460        |
| 4          | -0.142            | 2.300        | -0.109            | 2.914        | -0.289            | 2.310        | -0.546            | 2.760        |
| 5          | -0.112            | 2.440        | -0.116            | 2.856        | -0.226            | 2.480        | -0.576            | 2.740        |

Table S4. Water-model compounds minimum interaction energy distances and energies.

|            |                   | Set LJ parameters |                   | Final LJ parameters with NBFIX |                   | Ab initio    |  |
|------------|-------------------|-------------------|-------------------|--------------------------------|-------------------|--------------|--|
| Pyridine   |                   |                   |                   |                                |                   |              |  |
| Geom       | Energy (kcal/mol) | Distance (Å)      | Energy (kcal/mol) | Distance (Å)                   | Energy (kcal/mol) | Distance (Å) |  |
| 1          | -6.42             | 1.85              | -5.84             | 1.92                           | -6.37             | 1.91         |  |
| 2          | -3.13             | 2.20              | -2.98             | 2.26                           | -3.58             | 2.20         |  |
| 3          | -1.00             | 2.40              | -0.99             | 2.41                           | -1.47             | 2.32         |  |
| 4          | -1.38             | 2.42              | -1.38             | 2.42                           | -2.09             | 2.38         |  |
| Pyrimidine |                   |                   |                   |                                |                   |              |  |
| Geom       | Energy (kcal/mol) | Distance (Å)      | Energy (kcal/mol) | Distance (Å)                   | Energy (kcal/mol) | Distance (Å) |  |
| 1          | -6.06             | 1.83              | -5.53             | 1.89                           | -5.47             | 2.06         |  |
| 2          | -2.24             | 2.23              | -2.11             | 2.29                           | -2.21             | 2.29         |  |
| 3          | -1.77             | 2.33              | -1.75             | 2.34                           | -1.91             | 2.30         |  |
| 4          | -0.90             | 2.50              | -0.87             | 2.54                           | -0.88             | 2.58         |  |
| 5          | -0.92             | 2.39              | -0.90             | 2.41                           | -1.25             | 2.32         |  |
| 6          | -0.85             | 2.76              | -0.85             | 2.80                           | -1.20             | 2.57         |  |
| Imidazole  |                   |                   |                   |                                |                   |              |  |
| Geom       | Energy (kcal/mol) | Distance (Å)      | Energy (kcal/mol) | Distance (Å)                   | Energy (kcal/mol) | Distance (Å) |  |
| 1          | -7.06             | 1.84              | NA                | NA                             | -6.80             | 2.02         |  |
| 2          | -0.59             | 2.41              | NA                | NA                             | -0.67             | 2.42         |  |
| 3          | -2.18             | 2.26              | NA                | NA                             | -1.78             | 2.44         |  |
| 4          | -1.89             | 2.64              | NA                | NA                             | -2.31             | 2.32         |  |
| 5          | -2.95             | 2.33              | NA                | NA                             | -2.76             | 2.41         |  |
| 6          | -1.72             | 2.35              | NA                | NA                             | -1.67             | 2.47         |  |
| 7          | -1.72             | 2.35              | NA                | NA                             | -2.03             | 2.28         |  |
| Pyrrole    |                   |                   |                   |                                |                   |              |  |
| Geom       | Energy (kcal/mol) | Distance (Å)      | Energy (kcal/mol) | Distance (Å)                   | Energy (kcal/mol) | Distance (Å) |  |
| 1          | -1.91             | 2.24              | NA                | NA                             | -1.57             | 2.37         |  |
| 2          | -1.03             | 2.74              | NA                | NA                             | -1.70             | 2.35         |  |
| 3          | -0.51             | 2.68              | NA                | NA                             | -0.87             | 2.44         |  |
| 4          | -2.34             | 2.32              | NA                | NA                             | -2.61             | 2.34         |  |
| 5          | -3.66             | 2.19              | NA                | NA                             | -3.41             | 2.33         |  |

Table S5. RMS fluctuations about the average differences and ratios between the QM and CHARMM minimum interaction energies and distances for interactions with water.\*

| Complex                | $R_{\min}$ (Å) |       | $E_{\min}$ (kcal/mol) |       |
|------------------------|----------------|-------|-----------------------|-------|
|                        | Difference     | Ratio | Difference            | Ratio |
| Pyridine/Regular       | 0.051          | 0.024 | 0.277                 | 0.144 |
| Pyridine/NBFI          | 0.046          | 0.022 | 0.195                 | 0.131 |
| Pyrimidine/<br>Regular | 0.132          | 0.058 | 0.315                 | 0.149 |
| Pyrimidine/<br>NBFI    | 0.122          | 0.052 | 0.155                 | 0.122 |
| Imidazole/<br>Regular  | 0.166          | 0.072 | 0.278                 | 0.134 |
| Pyrrole/ Regular       | 0.211          | 0.089 | 0.380                 | 0.249 |

\* RMS fluctuations were calculated as in Yin and MacKerell.<sup>51</sup>

Table S6. Internal parameters for all compounds

| BONDS                           |        |         |        |  |  |  |
|---------------------------------|--------|---------|--------|--|--|--|
| $K_b$ : kcal/mol/Å <sup>2</sup> |        |         |        |  |  |  |
| $B_0$ : Å                       |        |         |        |  |  |  |
|                                 |        | $K_b$   | $B_0$  |  |  |  |
| ! Benzene                       |        |         |        |  |  |  |
| CD2R6A                          | CD2R6A | 305.000 | 1.3750 |  |  |  |
| HDR6A                           | CD2R6A | 340.000 | 1.0800 |  |  |  |
| ! Pyridine                      |        |         |        |  |  |  |
| CD2R6B                          | CD2R6A | 361.100 | 1.3780 |  |  |  |
| CD2R6B                          | ND2R6A | 407.800 | 1.3340 |  |  |  |
| HDR6B                           | CD2R6B | 340.000 | 1.0800 |  |  |  |
| ! Pyrimidine                    |        |         |        |  |  |  |
| CD2R6B                          | ND2R6B | 350.100 | 1.3120 |  |  |  |
| CD2R6C                          | ND2R6B | 423.400 | 1.3220 |  |  |  |
| HDR6C                           | CD2R6C | 320.000 | 1.0800 |  |  |  |
| ! Imidazole                     |        |         |        |  |  |  |
| CD2R5A                          | CD2R5A | 410.000 | 1.3600 |  |  |  |
| ND2R5A                          | CD2R5A | 400.000 | 1.3800 |  |  |  |

|                      |        |         |        |  |  |  |
|----------------------|--------|---------|--------|--|--|--|
| ND2R5A               | CD2R5B | 400.000 | 1.3600 |  |  |  |
| ND2R5A               | HDF1A  | 466.000 | 1.0000 |  |  |  |
| ND2R5B               | CD2R5A | 400.000 | 1.3800 |  |  |  |
| ND2R5B               | CD2R5B | 400.000 | 1.3200 |  |  |  |
| HDR5B                | CD2R5B | 340.000 | 1.0900 |  |  |  |
| HDR5A                | CD2R5A | 365.000 | 1.0830 |  |  |  |
|                      |        |         |        |  |  |  |
| ! Pyrrole            |        |         |        |  |  |  |
| HDR5C                | CD2R5C | 370.200 | 1.0800 |  |  |  |
| CD2R5A               | CD2R5C | 322.600 | 1.3970 |  |  |  |
| CD2R5C               | CD2R5C | 322.900 | 1.4300 |  |  |  |
|                      |        |         |        |  |  |  |
| ! Indole             |        |         |        |  |  |  |
| CD2R6D               | CD2R5C | 407.600 | 1.4200 |  |  |  |
| CD2R6D               | CD2R6A | 315.000 | 1.3820 |  |  |  |
| ND2R5A               | CD2R6D | 279.900 | 1.4150 |  |  |  |
| CD2R6D               | CD2R6D | 198.200 | 1.4000 |  |  |  |
|                      |        |         |        |  |  |  |
| ! Purine             |        |         |        |  |  |  |
| ND2R6B               | CD2R6F | 353.280 | 1.3100 |  |  |  |
| CD2R6F               | CD2R6F | 331.890 | 1.4690 |  |  |  |
| CD2R6F               | CD2R6B | 295.820 | 1.3980 |  |  |  |
| CD2R6F               | ND2R5A | 428.020 | 1.3810 |  |  |  |
| ND2R5B               | CD2R6F | 428.020 | 1.3810 |  |  |  |
|                      |        |         |        |  |  |  |
| ! 4-methyl-imidazole |        |         |        |  |  |  |
| CD33A                | CD2R5A | 229.600 | 1.5000 |  |  |  |
|                      |        |         |        |  |  |  |
| ! Methyl-indole      |        |         |        |  |  |  |
| CD2R5C               | CD33A  | 229.630 | 1.5000 |  |  |  |

| ANGLES                                            |           |        |              |                    |          |                |
|---------------------------------------------------|-----------|--------|--------------|--------------------|----------|----------------|
| $K_{\theta}$ : kcal/mol/rad <sup>2</sup>          |           |        |              |                    |          |                |
| Theta <sub>0</sub> : degrees                      |           |        |              |                    |          |                |
| $K_{ub}$ : kcal/mol/Å <sup>2</sup> (Urey-Bradley) |           |        |              |                    |          |                |
| S <sub>0</sub> : Å                                |           |        |              |                    |          |                |
|                                                   |           |        | $K_{\theta}$ | Theta <sub>0</sub> | $K_{ub}$ | S <sub>0</sub> |
| !!                                                | Aromatics |        |              |                    |          |                |
| CD2R6A                                            | CD2R6A    | CD2R6A | 40.000       | 120.00             | 35.00    | 2.41620        |
| HDR6A                                             | CD2R6A    | CD2R6A | 30.000       | 120.00             | 22.00    | 2.15250        |
| CD33A                                             | CD2R6A    | CD2R6A | 45.800       | 122.30             |          |                |
| HDA3A                                             | CD33A     | CD2R6A | 49.300       | 107.50             |          |                |
|                                                   |           |        |              |                    |          |                |
| !                                                 | Pyridine  |        |              |                    |          |                |
| CD2R6A                                            | CD2R6A    | CD2R6B | 46.100       | 120.00             | 29.80    | 2.44800        |
| CD2R6A                                            | CD2R6B    | ND2R6A | 27.400       | 119.20             |          |                |
| CD2R6B                                            | ND2R6A    | CD2R6B | 19.600       | 100.00             | 54.20    | 2.28500        |
| HDR6B                                             | CD2R6B    | CD2R6A | 43.400       | 120.00             | 18.60    | 2.15250        |



|        |            |        |         |        |       |         |
|--------|------------|--------|---------|--------|-------|---------|
| HDR6B  | CD2R6B     | ND2R6A | 25.900  | 112.00 | 32.20 | 2.05000 |
| HDR6A  | CD2R6A     | CD2R6B | 26.000  | 120.00 | 21.00 | 2.15250 |
|        |            |        |         |        |       |         |
| !      | Pyrimidine |        |         |        |       |         |
| CD2R6A | CD2R6B     | ND2R6B | 44.300  | 125.0  |       |         |
| CD2R6B | CD2R6A     | CD2R6B | 60.200  | 128.00 | 33.20 | 2.44000 |
| CD2R6C | ND2R6B     | CD2R6B | 27.500  | 110.00 | 66.70 | 2.20000 |
| ND2R6B | CD2R6C     | ND2R6B | 17.000  | 135.00 |       |         |
| HDR6B  | CD2R6B     | ND2R6B | 28.400  | 112.00 | 23.90 | 2.05000 |
| HDR6C  | CD2R6C     | ND2R6B | 28.400  | 112.00 | 23.90 | 2.05000 |
|        |            |        |         |        |       |         |
| !      | Imidazole  |        |         |        |       |         |
| CD2R5B | ND2R5A     | CD2R5A | 130.000 | 107.50 |       |         |
| CD2R5B | ND2R5B     | CD2R5A | 130.000 | 104.00 |       |         |
| HDP1A  | ND2R5A     | CD2R5A | 30.000  | 125.50 | 20.00 | 2.15000 |
| HDP1A  | ND2R5A     | CD2R5B | 30.000  | 127.00 | 20.00 | 2.14000 |
| HDP1A  | ND2R5C     | CD2R5A | 25.000  | 126.00 | 15.00 | 2.13000 |
| HDP1A  | ND2R5C     | CD2R5B | 25.000  | 126.00 | 15.00 | 2.09000 |
| HDR5B  | CD2R5A     | CD2R5A | 22.000  | 130.00 | 15.00 | 2.21500 |
| HDR5A  | CD2R5A     | CD2R5A | 25.000  | 130.00 | 20.00 | 2.20000 |
| ND2R5A | CD2R5A     | CD2R5A | 130.000 | 106.00 |       |         |
| ND2R5A | CD2R5A     | HDR5A  | 25.000  | 124.00 | 20.00 | 2.14000 |
| ND2R5A | CD2R5B     | HDR5B  | 25.000  | 122.50 | 20.00 | 2.14000 |
| ND2R5B | CD2R5A     | CD2R5A | 130.000 | 110.00 |       |         |
| ND2R5B | CD2R5A     | HDR5A  | 25.000  | 120.00 | 20.00 | 2.14000 |
| ND2R5B | CD2R5B     | HDR5B  | 25.000  | 125.00 | 20.00 | 2.12000 |
| ND2R5B | CD2R5B     | ND2R5A | 130.000 | 112.50 |       |         |
| !      | Pyrrrole   |        |         |        |       |         |
| HDR5A  | CD2R5A     | CD2R5C | 18.63   | 125.00 | 28.00 | 2.17300 |
| HDR5C  | CD2R5C     | CD2R5A | 12.72   | 126.40 | 28.00 | 2.21500 |
| HDR5C  | CD2R5C     | CD2R5C | 23.80   | 126.40 | 28.00 | 2.21500 |
| CD2R5A | CD2R5C     | CD2R5C | 80.00   | 106.40 | 27.90 | 2.26100 |
| CD2R5A | ND2R5A     | CD2R5A | 119.08  | 106.00 |       |         |
| ND2R5A | CD2R5A     | CD2R5C | 100.02  | 106.00 | 28.00 | 2.24000 |
|        |            |        |         |        |       |         |
| !      | Indole     |        |         |        |       |         |
| HDR5C  | CD2R5C     | CD2R6D | 1.7     | 124.7  | 8.3   | 2.3781  |
| HDP1A  | ND2R5A     | CD2R6D | 12.8    | 130.1  |       |         |
| CD2R6D | CD2R6A     | HDR6A  | 43.5    | 122.6  | 19.9  | 2.0833  |

|                      |        |        |         |          |      |        |
|----------------------|--------|--------|---------|----------|------|--------|
| CD2R6D               | CD2R5C | CD2R5A | 81.9    | 106.1    | 22.5 | 2.2163 |
| CD2R5C               | CD2R6D | CD2R6D | 81.9    | 106.1    | 22.5 | 2.2163 |
| CD2R5C               | CD2R6D | CD2R6A | 144.3   | 130.9    |      |        |
| CD2R5A               | ND2R5A | CD2R6D | 81.4    | 108.6    |      |        |
| CD2R6D               | CD2R6D | ND2R5A | 31.4    | 105.5    |      |        |
| ND2R5A               | CD2R6D | CD2R6A | 132.1   | 130.9    |      |        |
| CD2R6D               | CD2R6A | CD2R6A | 143.5   | 123.8    |      |        |
| CD2R6D               | CD2R6D | CD2R6A | 50.1    | 126.5    |      |        |
|                      |        |        |         |          |      |        |
| !Purine              |        |        |         |          |      |        |
| CD2R6C               | ND2R6B | CD2R6F | 26.300  | 121.10   | 75.0 | 2.3797 |
| ND2R6B               | CD2R6F | CD2R6F | 29.820  | 100.50   |      |        |
| CD2R6F               | CD2R6F | CD2R5B | 58.070  | 117.30   | 9.2  | 2.3476 |
| CD2R6F               | ND2R5B | CD2R5B | 127.910 | 103.00   |      |        |
| CD2R6F               | ND2R5A | CD2R5B | 137.460 | 109.60   |      |        |
| CD2R6F               | ND2R5A | HDP1A  | 37.590  | 113.10   | 28.7 | 2.2021 |
| CD2R6F               | CD2R6F | CD2R6B | 79.820  | 109.20   | 4.5  | 2.2904 |
| ND2R6B               | CD2R6B | CD2R6F | 23.160  | 123.30   |      |        |
| CD2R6F               | CD2R6B | HDR6B  | 13.060  | 105.10   | 27.6 | 2.1019 |
| CD2R6F               | CD2R6F | ND2R5A | 111.400 | 96.00    |      |        |
| CD2R6F               | CD2R6F | ND2R5B | 99.820  | 101.50   |      |        |
| !tautomer A          |        |        |         |          |      |        |
| CD2R6B               | CD2R6F | ND2R5A | 130.000 | 110.00   |      |        |
| ND2R6B               | CD2R6F | ND2R5B | 130.000 | 110.00   |      |        |
| !tautomer B          |        |        |         |          |      |        |
| CD2R6B               | CD2R6F | ND2R5B | 130.000 | 110.00   |      |        |
| ND2R6B               | CD2R6F | ND2R5A | 130.000 | 110.00   |      |        |
|                      |        |        |         |          |      |        |
| ! 4-methyl-imidazole |        |        |         |          |      |        |
| CD33A                | CD2R5A | ND2R5A | 45.800  | 124.0000 |      |        |
| CD33A                | CD2R5A | CD2R5A | 45.800  | 130.0000 |      |        |
| CD2R5A               | CD33A  | HDA3A  | 33.430  | 109.5000 |      |        |
|                      |        |        |         |          |      |        |
| ! Methyl-indole      |        |        |         |          |      |        |
| CD33A                | CD2R5C | CD2R6D | 45.800  | 122.3000 |      |        |
| CD33A                | CD2R5C | CD2R5A | 45.800  | 122.3000 |      |        |
| CD2R5C               | CD33A  | HDA3A  | 49.300  | 107.50   |      |        |

| DIHEDRALS                   |        |        |        |         |   |        |
|-----------------------------|--------|--------|--------|---------|---|--------|
| K <sub>chi</sub> : kcal/mol |        |        |        |         |   |        |
| n: multiplicity             |        |        |        |         |   |        |
| delta: degrees              |        |        |        |         |   |        |
| ! Benzene                   |        |        |        |         |   |        |
| CD2R6A                      | CD2R6A | CD2R6A | CD2R6A | 2.8000  | 2 | 180.00 |
| HDR6A                       | CD2R6A | CD2R6A | CD2R6A | 4.2000  | 2 | 180.00 |
| HDR6A                       | CD2R6A | CD2R6A | HDR6A  | 2.4000  | 2 | 180.00 |
| ! Pyridine                  |        |        |        |         |   |        |
| CD2R6A                      | CD2R6A | CD2R6B | ND2R6A | 0.860   | 2 | 180.00 |
| CD2R6A                      | CD2R6B | ND2R6A | CD2R6B | 2.200   | 2 | 180.00 |
| HDR6A                       | CD2R6A | CD2R6B | ND2R6A | 1.200   | 2 | 180.00 |
| HDR6B                       | CD2R6B | ND2R6A | CD2R6B | 4.300   | 2 | 180.00 |
| CD2R6B                      | CD2R6A | CD2R6A | CD2R6A | 5.350   | 2 | 180.00 |
| CD2R6A                      | CD2R6B | CD2R6A | CD2R6A | 4.400   | 2 | 180.00 |
| HDR6A                       | CD2R6A | CD2R6A | CD2R6B | 3.600   | 2 | 180.00 |
| HDR6B                       | CD2R6B | CD2R6A | CD2R6A | 5.400   | 2 | 180.00 |
| HDR6B                       | CD2R6B | CD2R6A | HDR6A  | 2.400   | 2 | 180.00 |
| ! Pyrimidine                |        |        |        |         |   |        |
| CD2R6A                      | CD2R6B | ND2R6B | CD2R6C | 2.000   | 2 | 180.0  |
| CD2R6B                      | CD2R6A | CD2R6B | ND2R6B | 0.810   | 2 | 180.0  |
| CD2R6B                      | ND2R6B | CD2R6C | ND2R6B | 4.520   | 2 | 180.0  |
| HDR6A                       | CD2R6A | CD2R6B | ND2R6B | 3.420   | 2 | 180.00 |
| HDR6B                       | CD2R6B | CD2R6A | CD2R6B | 1.380   | 2 | 180.00 |
| HDR6B                       | CD2R6B | ND2R6B | CD2R6C | 10.740  | 2 | 180.00 |
| HDR6C                       | CD2R6C | ND2R6B | CD2R6B | 8.150   | 2 | 180.00 |
| ! Imidazole                 |        |        |        |         |   |        |
| CD2R5B                      | ND2R5A | CD2R5A | CD2R5A | 14.0000 | 2 | 180.00 |
| CD2R5B                      | ND2R5B | CD2R5A | CD2R5A | 14.0000 | 2 | 180.00 |
| HDR5B                       | CD2R5B | ND2R5A | CD2R5A | 3.0000  | 2 | 180.00 |
| HDR5B                       | CD2R5B | ND2R5B | CD2R5A | 3.0000  | 2 | 180.00 |
| ND2R5A                      | CD2R5A | CD2R5A | HDR5A  | 3.0000  | 2 | 180.00 |
| ND2R5A                      | CD2R5B | ND2R5B | CD2R5A | 14.0000 | 2 | 180.00 |
| ND2R5B                      | CD2R5A | CD2R5A | HDR5A  | 3.0000  | 2 | 180.00 |
| ND2R5B                      | CD2R5A | CD2R5A | ND2R5A | 14.0000 | 2 | 180.00 |
| ND2R5B                      | CD2R5B | ND2R5A | CD2R5A | 14.0000 | 2 | 180.00 |
| HDR5A                       | CD2R5A | CD2R5A | HDR5A  | 2.0000  | 2 | 180.00 |
| HDR5A                       | CD2R5A | ND2R5A | HDP1A  | 0.0000  | 2 | 180.00 |
| HDR5A                       | CD2R5A | ND2R5A | CD2R5B | 3.0000  | 2 | 180.00 |
| HDR5A                       | CD2R5A | ND2R5B | CD2R5B | 3.0000  | 2 | 180.00 |
| HDP1A                       | ND2R5A | CD2R5A | CD2R5A | 1.1000  | 2 | 180.00 |
| HDR5B                       | CD2R5B | ND2R5A | HDP1A  | 0.9000  | 2 | 180.00 |
| ND2R5B                      | CD2R5B | ND2R5A | HDP1A  | 1.1000  | 2 | 180.00 |
| ! Pyrrole                   |        |        |        |         |   |        |
| HDR5C                       | CD2R5C | CD2R5A | HDR5A  | 0.2800  | 2 | 180.00 |
| HDR5C                       | CD2R5C | CD2R5C | HDR5C  | 0.7000  | 2 | 180.00 |

|                                   |        |        |        |         |   |        |
|-----------------------------------|--------|--------|--------|---------|---|--------|
| HDP1A                             | ND2R5A | CD2R5A | CD2R5C | 1.3000  | 2 | 180.00 |
| CD2R5A                            | ND2R5A | CD2R5A | HDR5A  | 2.6000  | 2 | 180.00 |
| CD2R5A                            | CD2R5C | CD2R5C | HDR5C  | 3.9000  | 2 | 180.00 |
| CD2R5A                            | CD2R5C | CD2R5C | CD2R5A | 10.9000 | 2 | 180.00 |
| CD2R5C                            | CD2R5A | ND2R5A | CD2R5A | 14.4000 | 2 | 180.00 |
| CD2R5C                            | CD2R5C | CD2R5A | HDR5A  | 3.4000  | 2 | 180.00 |
| CD2R5C                            | CD2R5C | CD2R5A | ND2R5A | 7.8000  | 2 | 180.00 |
| ND2R5A                            | CD2R5A | CD2R5C | HDR5C  | 1.1000  | 2 | 180.00 |
|                                   |        |        |        |         |   |        |
| ! Indole                          |        |        |        |         |   |        |
| ! PYRTOR+PYRTOR' pyrrole ring     |        |        |        |         |   |        |
| CD2R5C                            | CD2R6D | CD2R6D | ND2R5A | 8.50    | 2 | 180.00 |
| CD2R5C                            | CD2R5A | ND2R5A | CD2R6D | 9.52    | 2 | 180.00 |
| CD2R6D                            | CD2R5C | CD2R5A | ND2R5A | 8.19    | 2 | 180.00 |
| CD2R6D                            | CD2R6D | ND2R5A | CD2R5A | 8.26    | 2 | 180.00 |
| CD2R5A                            | CD2R5C | CD2R6D | CD2R6D | 6.34    | 2 | 180.00 |
|                                   |        |        |        |         |   |        |
| !BUTTERFLY motion                 |        |        |        |         |   |        |
| CD2R5C                            | CD2R6D | CD2R6D | CD2R6A | 1.76    | 2 | 180.00 |
| CD2R5C                            | CD2R6D | CD2R6A | CD2R6A | 1.68    | 2 | 180.00 |
| ND2R5A                            | CD2R6D | CD2R6D | CD2R6A | 1.61    | 2 | 180.00 |
| ND2R5A                            | CD2R6D | CD2R6A | CD2R6A | 1.93    | 2 | 180.00 |
| CD2R5A                            | ND2R5A | CD2R6D | CD2R6A | 2.04    | 2 | 180.00 |
| CD2R5A                            | CD2R5C | CD2R6D | CD2R6A | 6.61    | 2 | 180.00 |
|                                   |        |        |        |         |   |        |
| ! PUCK-ASYDEF+ASYDEF' phenyl ring |        |        |        |         |   |        |
| CD2R6D                            | CD2R6D | CD2R6A | CD2R6A | 1.34    | 2 | 180.00 |
| CD2R6D                            | CD2R6A | CD2R6A | CD2R6A | 1.38    | 2 | 180.00 |
| CD2R6D                            | CD2R6A | CD2R6A | CD2R6A | 0.21    | 2 | 180.00 |
| CD2R6A                            | CD2R6D | CD2R6D | CD2R6A | 3.46    | 2 | 180.00 |
|                                   |        |        |        |         |   |        |
| ! wbzCH1 wagging                  |        |        |        |         |   |        |
| CD2R5C                            | CD2R6D | CD2R6A | HDR6A  | 0.44    | 2 | 180.00 |
| CD2R6D                            | CD2R6D | CD2R6A | HDR6A  | 0.85    | 2 | 180.00 |
|                                   |        |        |        |         |   |        |
| CD2R6D                            | CD2R6D | CD2R6A | HDR6A  | 0.07    | 2 | 180.00 |
| ND2R5A                            | CD2R6D | CD2R6A | HDR6A  | 0.92    | 2 | 180.00 |
|                                   |        |        |        |         |   |        |
| ! wbzCH2 wagging                  |        |        |        |         |   |        |
| CD2R6D                            | CD2R6A | CD2R6A | HDR6A  | 0.60    | 2 | 180.00 |
| CD2R6D                            | CD2R6A | CD2R6A | HDR6A  | 0.60    | 2 | 180.00 |
|                                   |        |        |        |         |   |        |
| ! wpCH3                           |        |        |        |         |   |        |
| HDR5C                             | CD2R5C | CD2R6D | CD2R6D | 0.15    | 2 | 180.00 |
| HDR5C                             | CD2R5C | CD2R6D | CD2R6A | 0.15    | 2 | 180.00 |
|                                   |        |        |        |         |   |        |
| ! wpCH4                           |        |        |        |         |   |        |
| CD2R6D                            | CD2R5C | CD2R5A | HDR5A  | 0.81    | 2 | 180.00 |
| HDR5A                             | CD2R5A | ND2R5A | CD2R6D | 0.81    | 2 | 180.00 |
|                                   |        |        |        |         |   |        |
| ! wNH                             |        |        |        |         |   |        |
| HDP1A                             | ND2R5A | CD2R6D | CD2R6A | 0.25    | 2 | 180.00 |
| CD2R6D                            | CD2R6D | ND2R5A | HDP1A  | 0.25    | 2 | 180.00 |
|                                   |        |        |        |         |   |        |

|                      |        |        |        |        |   |        |
|----------------------|--------|--------|--------|--------|---|--------|
| ! Purine             |        |        |        |        |   |        |
| ND2R6B               | CD2R6C | ND2R6B | CD2R6F | 0.10   | 2 | 180.00 |
| ND2R6B               | CD2R6B | CD2R6F | CD2R6F | 0.10   | 2 | 180.00 |
| CD2R6C               | ND2R6B | CD2R6B | CD2R6F | 7.80   | 2 | 180.00 |
| CD2R6C               | ND2R6B | CD2R6F | CD2R6F | 7.80   | 2 | 180.00 |
| ND2R6B               | CD2R6F | CD2R6F | CD2R6B | 0.10   | 2 | 180.00 |
| HDR6C                | CD2R6C | ND2R6B | CD2R6F | 6.50   | 2 | 180.00 |
|                      |        |        |        |        |   |        |
| CD2R6F               | CD2R6F | ND2R5A | CD2R5B | 6.20   | 2 | 180.00 |
| CD2R6F               | ND2R5B | CD2R5B | ND2R5A | 11.50  | 2 | 180.00 |
| ND2R5B               | CD2R6F | CD2R6F | ND2R5A | 5.10   | 2 | 180.00 |
| CD2R6F               | ND2R5A | CD2R5B | ND2R5B | 12.00  | 2 | 180.00 |
| CD2R6F               | CD2R6F | CD2R6B | HDR6B  | 0.10   | 2 | 180.0  |
| CD2R6F               | ND2R5A | CD2R5B | HDR5B  | 4.70   | 2 | 180.00 |
| CD2R6F               | ND2R5B | CD2R5B | HDR5B  | 4.70   | 2 | 180.00 |
| CD2R6F               | CD2R6F | ND2R5A | HDP1A  | 2.70   | 2 | 180.00 |
|                      |        |        |        |        |   |        |
| CD2R6B               | CD2R6F | ND2R5A | CD2R5B | 2.00   | 2 | 180.0  |
| CD2R6B               | CD2R6F | ND2R5A | HDP1A  | 1.00   | 2 | 180.00 |
| HDR6B                | CD2R6B | CD2R6F | ND2R5A | 2.00   | 2 | 180.0  |
|                      |        |        |        |        |   |        |
| ND2R6B               | CD2R6F | CD2R6F | ND2R5B | 14.00  | 2 | 180.0  |
| CD2R6B               | CD2R6F | CD2R6F | ND2R5A | 14.00  | 2 | 180.0  |
| ND2R6B               | CD2R6B | CD2R6F | ND2R5B | 5.70   | 2 | 180.00 |
| CD2R6C               | ND2R6B | CD2R6F | ND2R5A | 5.70   | 2 | 180.00 |
| ND2R6B               | CD2R6F | ND2R5A | CD2R5B | 5.70   | 2 | 180.00 |
| CD2R6F               | CD2R6F | ND2R5B | CD2R5B | 5.70   | 2 | 180.0  |
| !tautomer            | 0      |        |        |        |   |        |
| CD2R6B               | CD2R6F | ND2R5B | CD2R5B | 2.0    | 2 | 180.0  |
| ND2R6B               | CD2R6F | ND2R5A | HDP1A  | 1.0    | 2 | 180.00 |
| HDR6B                | CD2R6B | CD2R6F | ND2R5B | 2.0    | 2 | 180.0  |
|                      |        |        |        |        |   |        |
| ND2R6B               | CD2R6F | CD2R6F | ND2R5A | 14.0   | 2 | 180.0  |
| CD2R6B               | CD2R6F | CD2R6F | ND2R5B | 14.0   | 2 | 180.0  |
| ND2R6B               | CD2R6B | CD2R6F | ND2R5A | 5.7    | 2 | 180.00 |
| CD2R6C               | ND2R6B | CD2R6F | ND2R5B | 5.7    | 2 | 180.00 |
| ND2R6B               | CD2R6F | ND2R5B | CD2R5B | 5.7    | 2 | 180.00 |
|                      |        |        |        |        |   |        |
| ! 4-methyl-imidazole |        |        |        |        |   |        |
| CD33A                | CD2R5A | ND2R5A | HDP1A  | 1.0000 | 2 | 180.00 |
| CD33A                | CD2R5A | ND2R5A | CD2R5B | 3.0000 | 2 | 180.00 |
| CD33A                | CD2R5A | CD2R5A | HDR5A  | 2.0000 | 2 | 180.00 |
| CD33A                | CD2R5A | CD2R5A | ND2R5B | 3.0000 | 2 | 180.00 |
| HDA3A                | CD33A  | CD2R5A | ND2R5A | 0.1900 | 3 | 0.00   |
| HDA3A                | CD33A  | CD2R5A | CD2R5A | 0.0000 | 3 | 0.00   |
|                      |        |        |        |        |   |        |
| ! Methyl-indole      |        |        |        |        |   |        |
| CD33A                | CD2R5C | CD2R6D | CD2R6D | 3.1000 | 2 | 180.00 |
| CD33A                | CD2R5C | CD2R6D | CD2R6A | 3.1000 | 2 | 180.00 |
| CD33A                | CD2R5C | CD2R5A | HDR5A  | 4.2000 | 2 | 180.00 |
| CD33A                | CD2R5C | CD2R5A | ND2R5A | 3.0000 | 2 | 180.00 |
| HDA3A                | CD33A  | CD2R5C | CD2R6D | 0.0000 | 3 | 0.00   |
| HDA3A                | CD33A  | CD2R5C | CD2R5A | 0.0000 | 3 | 0.00   |

Table S7. Final nonbond parameters: Lennard-Jones parameters, charges, polarizabilities and Thole factors and LJ parameters for all compounds.

Lennard-Jones parameters

| Atom type | epsilon | Rmin/2 |                                              |
|-----------|---------|--------|----------------------------------------------|
| CD2R6A    | -0.0690 | 2.090  | ! BENZ, benzene                              |
| CD2R6B    | -0.0940 | 2.000  | ! PYR, pyridine (adjacent to N)              |
| CD2R6C    | -0.1120 | 2.000  | ! PYRM, pyrimidine (between 2 Ns)            |
| CD2R6D    | -0.0380 | 1.900  | ! INDO, indole: 5,6 membered ring bisector C |
| HDR6A     | -0.0300 | 1.0500 | ! BENZ, benzene                              |
| HDR6B     | -0.0700 | 0.8000 | ! PYR, pyridine (on carbon adjacent to N)    |
| HDR6C     | -0.0700 | 0.8000 | ! PYRM, pyrimidine (on carbon between 2 Ns)  |
| ND2R6A    | -0.070  | 1.9800 | ! PYR, pyridine (N acceptor)                 |
| ND2R6B    | -0.100  | 1.9000 | ! PYRM, pyrimidine (N acceptor)              |
| CD2R5A    | -0.095  | 2.070  | ! IMID, imidazole, CG,CD2                    |
| CD2R5B    | -0.093  | 1.980  | ! IMID, imidazole, CE1                       |
| CD2R5C    | -0.050  | 2.090  | ! PYRR, pyrrole                              |
| HDP1A     | -0.0100 | 0.4000 | ! polar hydrogen                             |
| HDR5A     | -0.0550 | 1.2500 | ! IMID, imidazole, PYRR on C adjacent to N   |
| HDR5B     | -0.0870 | 1.1000 | ! IMID, imidazole                            |
| HDR5C     | -0.0360 | 1.1800 | ! PYRR, pyrrole                              |
| ND2R5A    | -0.087  | 1.8610 | ! IMID, imidazole (N-H donor)                |
| ND2R5B    | -0.069  | 1.9560 | ! IMID, imidazole (N acceptor)               |

LJ Off diagonal terms to be used in combination with the SWM4-NDP water model oxygen LJ parameters

|        |         |        |                                   |
|--------|---------|--------|-----------------------------------|
| CD2R6A | -0.0500 | 2.150  | ! BENZ, benzene                   |
| CD2R6B | -0.0940 | 2.020  | ! PYR, pyridine (adjacent to N)   |
| CD2R6C | -0.1080 | 2.050  | ! PYRM, pyrimidine (between 2 Ns) |
| ND2R6A | -0.070  | 2.0000 | ! PYR, pyridine (N acceptor)      |
| ND2R6B | -0.100  | 1.9500 | ! PYRM, pyrimidine (N acceptor)   |

RESI PYR 0.00 ! pyridine

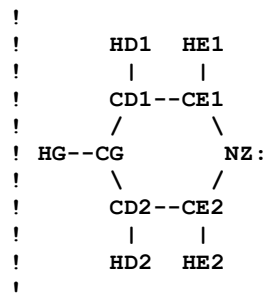

GROUP

|          |        |         |       |         |       |       |                         |
|----------|--------|---------|-------|---------|-------|-------|-------------------------|
| ATOM CG  | CD2R6A | -0.1334 | ALPHA | -1.5954 | THOLE | 1.312 |                         |
| ATOM HG  | HDR6A  | 0.2070  |       |         |       |       |                         |
| ATOM CD1 | CD2R6A | -0.1746 | ALPHA | -1.6184 | THOLE | 1.312 |                         |
| ATOM HD1 | HDR6A  | 0.0737  |       |         |       |       |                         |
| ATOM CD2 | CD2R6A | -0.1746 | ALPHA | -1.6184 | THOLE | 1.312 |                         |
| ATOM HD2 | HDR6A  | 0.0737  |       |         |       |       |                         |
| ATOM CE1 | CD2R6B | 0.1944  | ALPHA | -1.6286 | THOLE | 0.988 |                         |
| ATOM HE1 | HDR6B  | 0.0522  |       |         |       |       |                         |
| ATOM CE2 | CD2R6B | 0.1944  | ALPHA | -1.6286 | THOLE | 0.988 |                         |
| ATOM HE2 | HDR6B  | 0.0522  |       |         |       |       |                         |
| ATOM NZ  | ND2R6A | 0.0000  | ALPHA | -1.0183 | THOLE | 1.057 | ! fitchg ALPHA - 0.8674 |
| ATOM LP1 | LP     | -0.3650 |       |         |       |       |                         |

ANISOTROPY NZ LP1 CE1 CE2 A11 1.16107 A22 0.67785

RESI PYRM 0.00 ! pyrimidine, NA based numbering

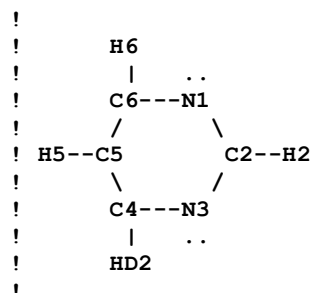

GROUP

|          |        |          |       |          |       |       |                  |
|----------|--------|----------|-------|----------|-------|-------|------------------|
| ATOM C5  | CD2R6A | -0.46838 | ALPHA | -1.64135 | THOLE | 1.057 |                  |
| ATOM H5  | HDR6A  | 0.15270  |       |          |       |       |                  |
| ATOM C6  | CD2R6B | 0.263165 | ALPHA | -1.6184  | THOLE | 1.169 |                  |
| ATOM H6  | HDR6B  | 0.11538  |       |          |       |       |                  |
| ATOM C4  | CD2R6B | 0.263165 | ALPHA | -1.6184  | THOLE | 1.169 |                  |
| ATOM H4  | HDR6B  | 0.11538  |       |          |       |       |                  |
| ATOM N1  | ND2R6B | 0.00000  | ALPHA | -1.02425 | THOLE | 1.089 | ! fitchg -0.8724 |
| ATOM LP1 | LP     | -0.46509 |       |          |       |       |                  |
| ATOM N3  | ND2R6B | 0.00000  | ALPHA | -1.02425 | THOLE | 1.089 | ! fitchg -0.8724 |
| ATOM LP3 | LP     | -0.46509 |       |          |       |       |                  |
| ATOM C2  | CD2R6C | 0.43181  | ALPHA | -1.6286  | THOLE | 0.761 |                  |
| ATOM H2  | HDR6C  | 0.05696  |       |          |       |       |                  |

ANISOTROPY N1 LP1 C6 C2 A11 1.2376 A22 0.6648

ANISOTROPY N3 LP3 C4 C2 A11 1.2376 A22 0.6648

RESI IMID 0.00 ! Imidazole, adm jr.

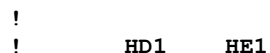

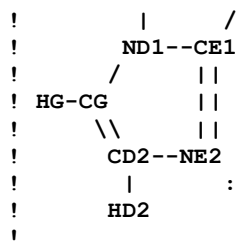

GROUP

|          |        |          |       |          |       |       |
|----------|--------|----------|-------|----------|-------|-------|
| ATOM CG  | CD2R5A | -0.34331 | ALPHA | -1.63200 | THOLE | 0.949 |
| ATOM HG  | HDR5A  | 0.21553  |       |          |       |       |
| ATOM CD2 | CD2R5A | 0.03675  | ALPHA | -1.62605 | THOLE | 0.949 |
| ATOM HD2 | HDR5A  | 0.09108  |       |          |       |       |
| ATOM ND1 | ND2R5A | -0.05266 | ALPHA | -1.39315 | THOLE | 0.670 |
| ATOM HD1 | HDP1A  | 0.24366  |       |          |       |       |
| ATOM CE1 | CD2R5B | 0.04023  | ALPHA | -1.63200 | THOLE | 1.568 |
| ATOM HE1 | HDR5B  | 0.10719  |       |          |       |       |
| ATOM NE2 | ND2R5B | 0.000    | ALPHA | -1.04380 | THOLE | 0.788 |
| ATOM LP1 | LP     | -0.33847 |       |          |       |       |

ANISOTROPY            NE2 LP1 CE1 CD2    A11 0.808    A22 1.384

RESI PYRR            0.000 ! pyrrole

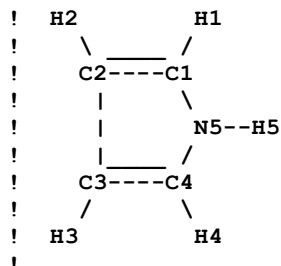

GROUP

|          |        |          |       |          |       |       |
|----------|--------|----------|-------|----------|-------|-------|
| ATOM C1  | CD2R5A | -0.00431 | ALPHA | -1.61755 | THOLE | 0.190 |
| ATOM HP1 | HDR5A  | 0.08384  |       |          |       |       |
| ATOM C2  | CD2R5C | -0.20244 | ALPHA | -1.62095 | THOLE | 1.018 |
| ATOM HP2 | HDR5C  | 0.11235  |       |          |       |       |
| ATOM C3  | CD2R5C | -0.20244 | ALPHA | -1.62095 | THOLE | 1.018 |
| ATOM HP3 | HDR5C  | 0.11235  |       |          |       |       |
| ATOM C4  | CD2R5A | -0.00431 | ALPHA | -1.61755 | THOLE | 0.190 |
| ATOM HP4 | HDR5A  | 0.08384  |       |          |       |       |
| ATOM N5  | ND2R5A | -0.27227 | ALPHA | -1.37785 | THOLE | 1.648 |
| ATOM HP5 | HDP1A  | 0.29339  |       |          |       |       |

RESI INDO            0.00 ! indole

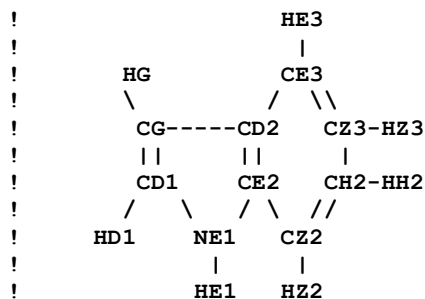

GROUP



|      |     |        |          |       |          |       |       |
|------|-----|--------|----------|-------|----------|-------|-------|
| ATOM | CD2 | CD2R6D | -0.17668 | ALPHA | -1.12115 | THOLE | 1.344 |
| ATOM | CE2 | CD2R6D | 0.03338  | ALPHA | -1.2529  | THOLE | 1.009 |
| ATOM | CZ2 | CD2R6A | -0.06941 | ALPHA | -1.61585 | THOLE | 1.300 |
| ATOM | CH2 | CD2R6A | -0.08614 | ALPHA | -1.61925 | THOLE | 1.300 |
| ATOM | CZ3 | CD2R6A | -0.16212 | ALPHA | -1.6184  | THOLE | 1.300 |
| ATOM | CE3 | CD2R6A | -0.02859 | ALPHA | -1.61755 | THOLE | 1.300 |
| ATOM | CG  | CD2R5C | -0.14068 | ALPHA | -1.6201  | THOLE | 1.346 |
| ATOM | CD1 | CD2R5A | 0.05490  | ALPHA | -1.61755 | THOLE | 1.265 |
| ATOM | NE1 | ND2R5A | -0.20671 | ALPHA | -1.3838  | THOLE | 1.146 |
| ATOM | HZ2 | HDR6A  | 0.03549  |       |          |       |       |
| ATOM | HH2 | HDR6A  | 0.12228  |       |          |       |       |
| ATOM | HZ3 | HDR6A  | 0.07584  |       |          |       |       |
| ATOM | HE3 | HDR6A  | 0.07629  |       |          |       |       |
| ATOM | HG  | HDR5C  | 0.10251  |       |          |       |       |
| ATOM | HD1 | HDR5A  | 0.04689  |       |          |       |       |
| ATOM | HE1 | HDP1A  | 0.32275  |       |          |       |       |

RESI PUR1 0.00 ! purine 7H

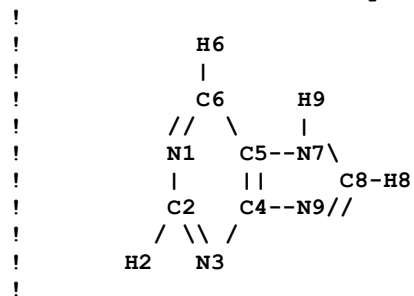

GROUP

|          |        |            |       |          |       |       |
|----------|--------|------------|-------|----------|-------|-------|
| ATOM N1  | ND2R6B | 0.000000   | ALPHA | -0.99875 | THOLE | 0.916 |
| ATOM LP1 | LP     | -0.337561  |       |          |       |       |
| ATOM C2  | CD2R6C | 0.122627   | ALPHA | -1.50025 | THOLE | 1.309 |
| ATOM H2  | HDR6C  | 0.068786   |       |          |       |       |
| ATOM N3  | ND2R6B | 0.000000   | ALPHA | -1.0268  | THOLE | 0.916 |
| ATOM LP2 | LP     | -0.352369  |       |          |       |       |
| ATOM C4  | CD2R6F | 0.36017    | ALPHA | -1.03445 | THOLE | 1.170 |
| ATOM C5  | CD2R6F | -0.0662578 | ALPHA | -1.26905 | THOLE | 1.271 |
| ATOM C6  | CD2R6B | 0.18766    | ALPHA | -1.62945 | THOLE | 1.244 |
| ATOM H6  | HDR6B  | 0.13229    |       |          |       |       |
| ATOM N7  | ND2R5B | 0.000000   | ALPHA | -0.9928  | THOLE | 1.065 |
| ATOM LP3 | LP     | -0.264776  |       |          |       |       |
| ATOM C8  | CD2R5B | -0.13375   | ALPHA | -1.52405 | THOLE | 1.122 |
| ATOM H8  | HDR5B  | 0.145501   |       |          |       |       |
| ATOM N9  | ND2R5A | -0.208358  | ALPHA | -1.13985 | THOLE | 1.176 |
| ATOM H9  | HDP1A  | 0.346038   |       |          |       |       |

|            |    |     |    |    |     |        |     |        |
|------------|----|-----|----|----|-----|--------|-----|--------|
| ANISOTROPY | N1 | LP1 | C6 | C2 | A11 | 1.2376 | A22 | 0.6648 |
| ANISOTROPY | N3 | LP3 | C4 | C2 | A11 | 1.2376 | A22 | 0.6648 |
| ANISOTROPY | N7 | LP3 | C4 | C8 | A11 | 0.808  | A22 | 1.384  |

Figure S1. Sodium cation-model compound interaction orientations.

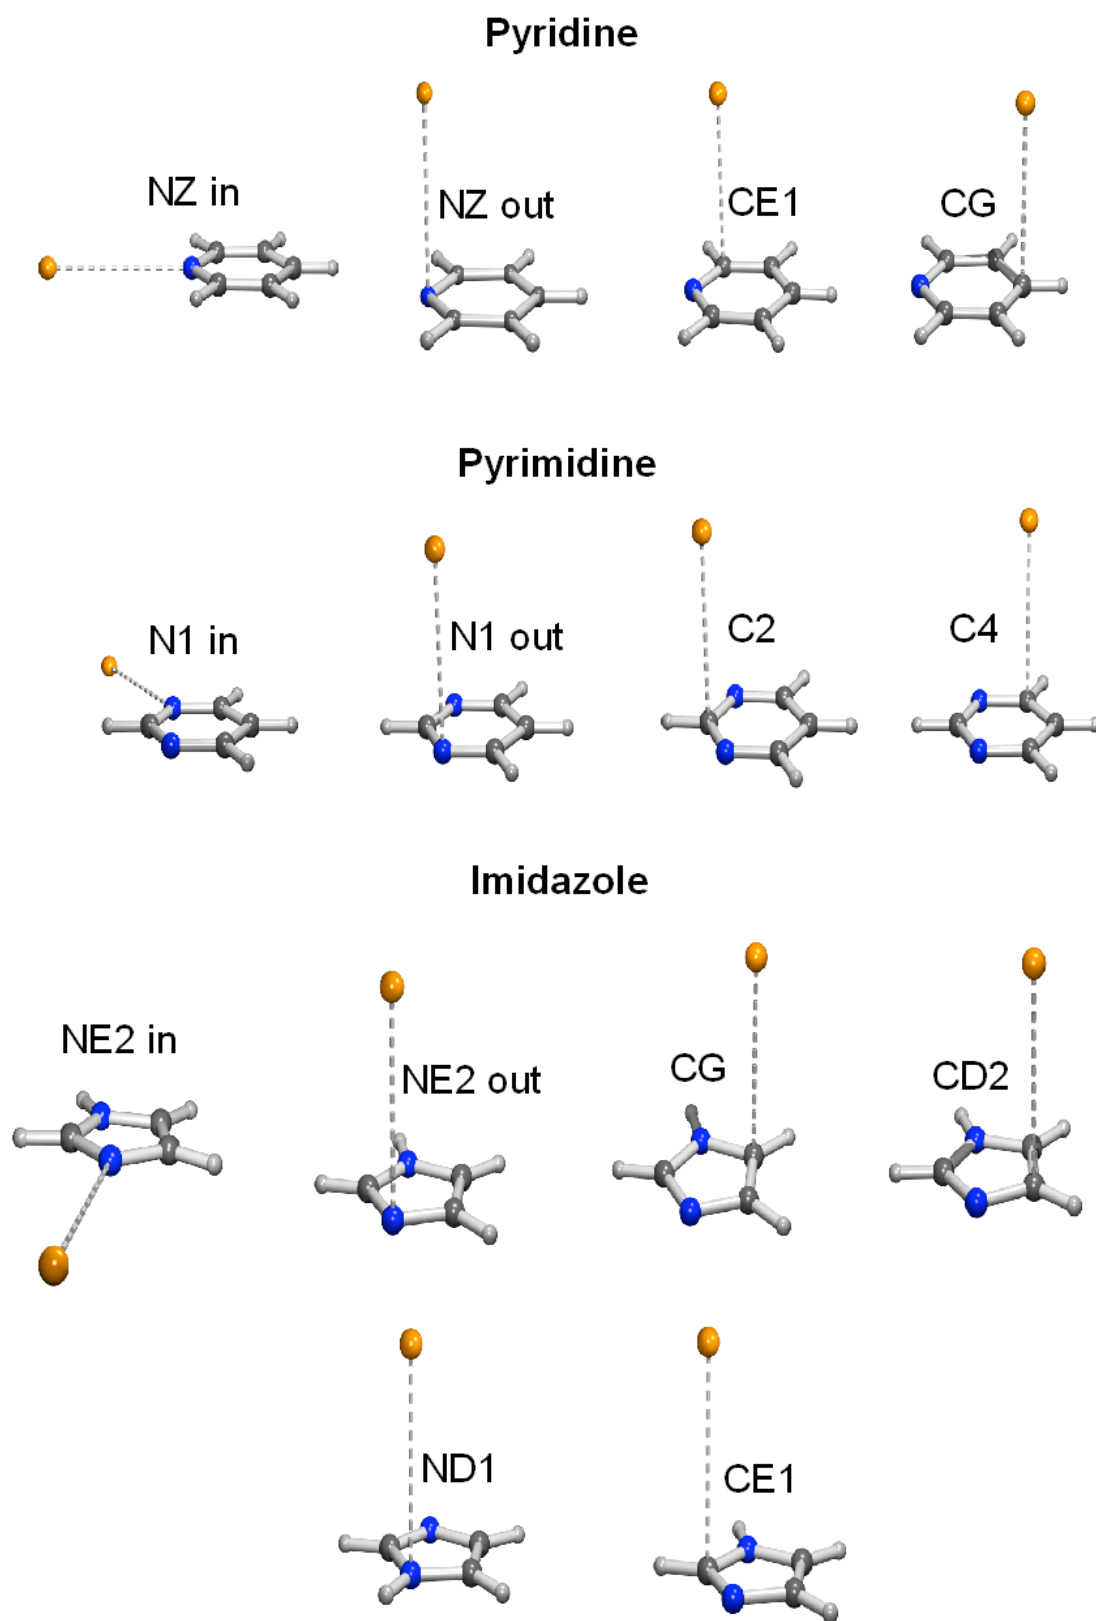

Figure S2. Rare gas-model compound interaction orientations

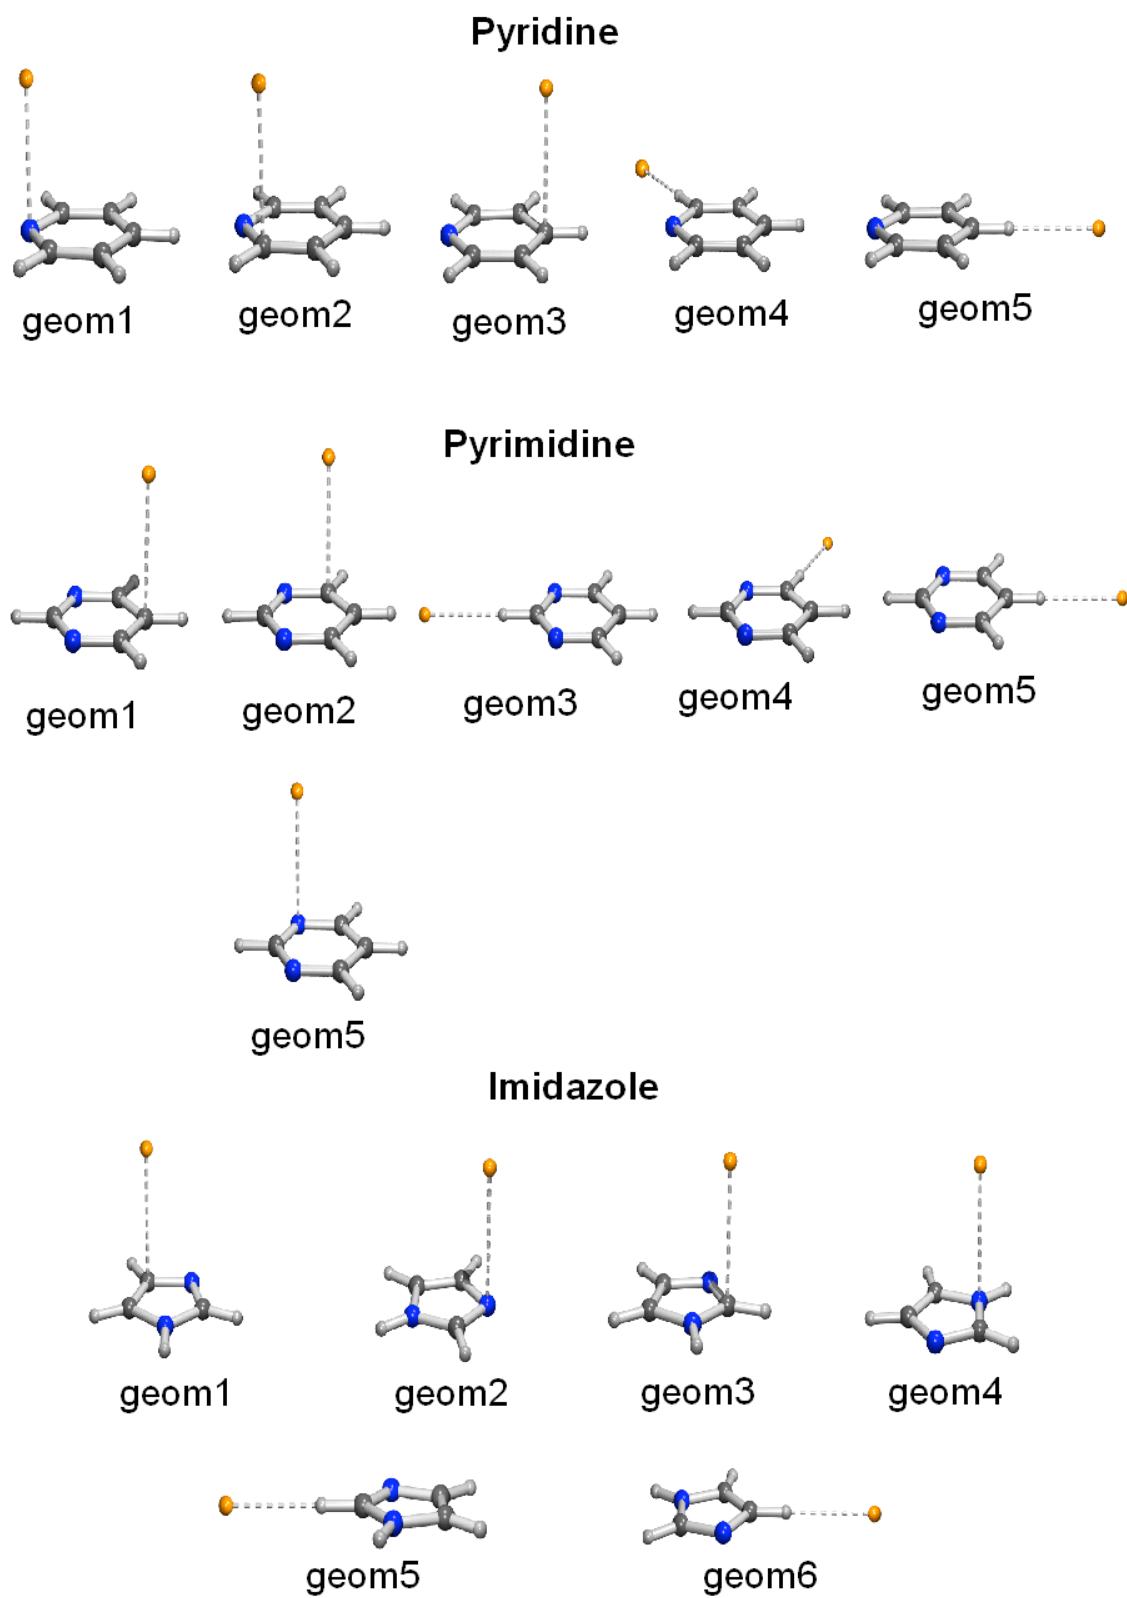

Figure S3. Model compound homodimer interaction orientations. Only in-plane orientations are considered.

### Pyridine

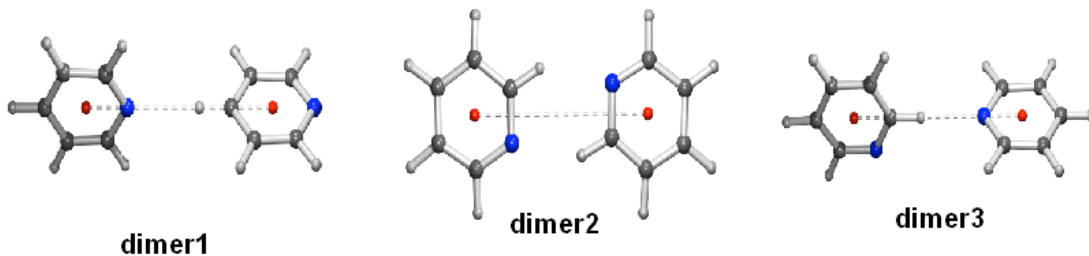

### Pyrimidine

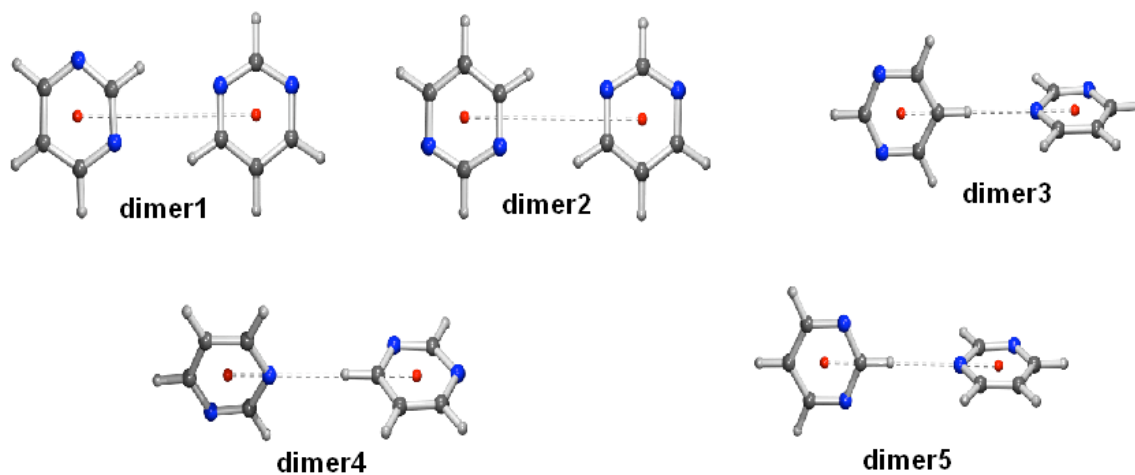

### Imidazole

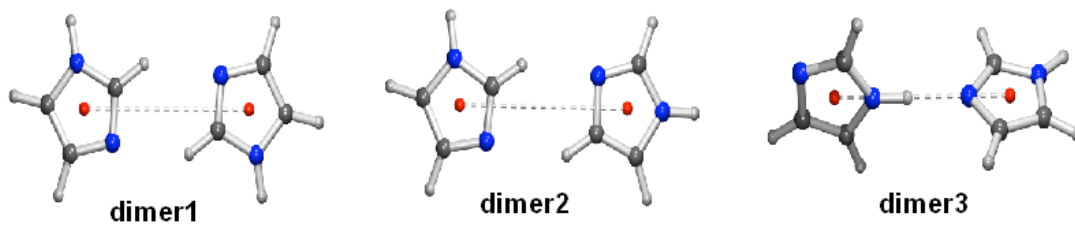

Figure S4. Interaction orientations of pyridine, pyrimidine and pyrrole with the water molecule.

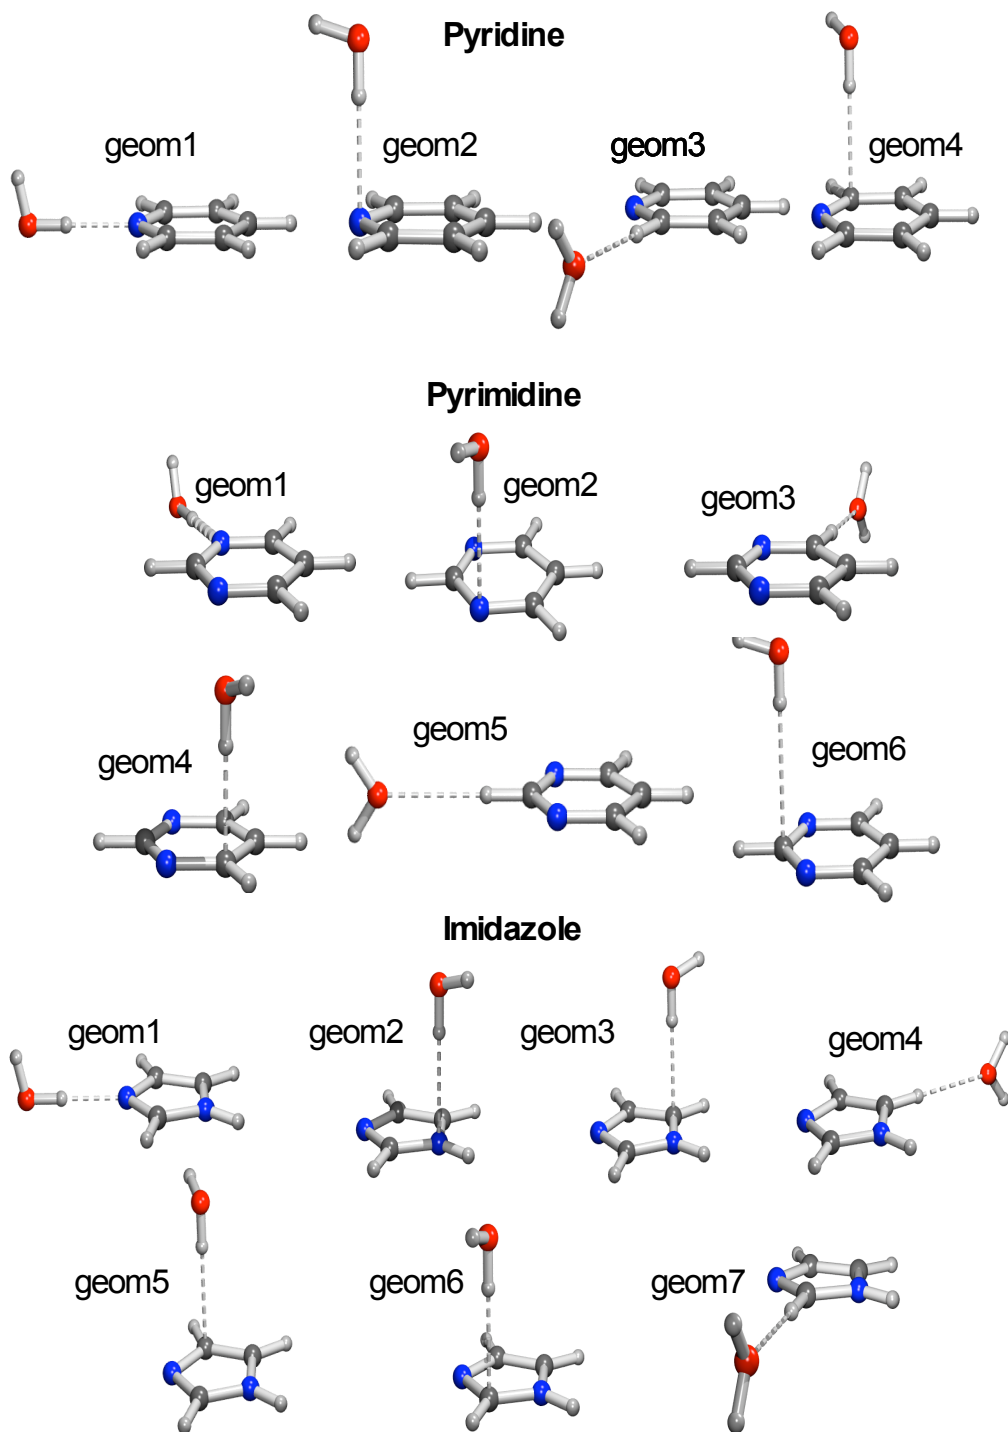

Figure S5. View of the final spashot of the MD simulation (red) superimposed on the x-ray structure (blue).

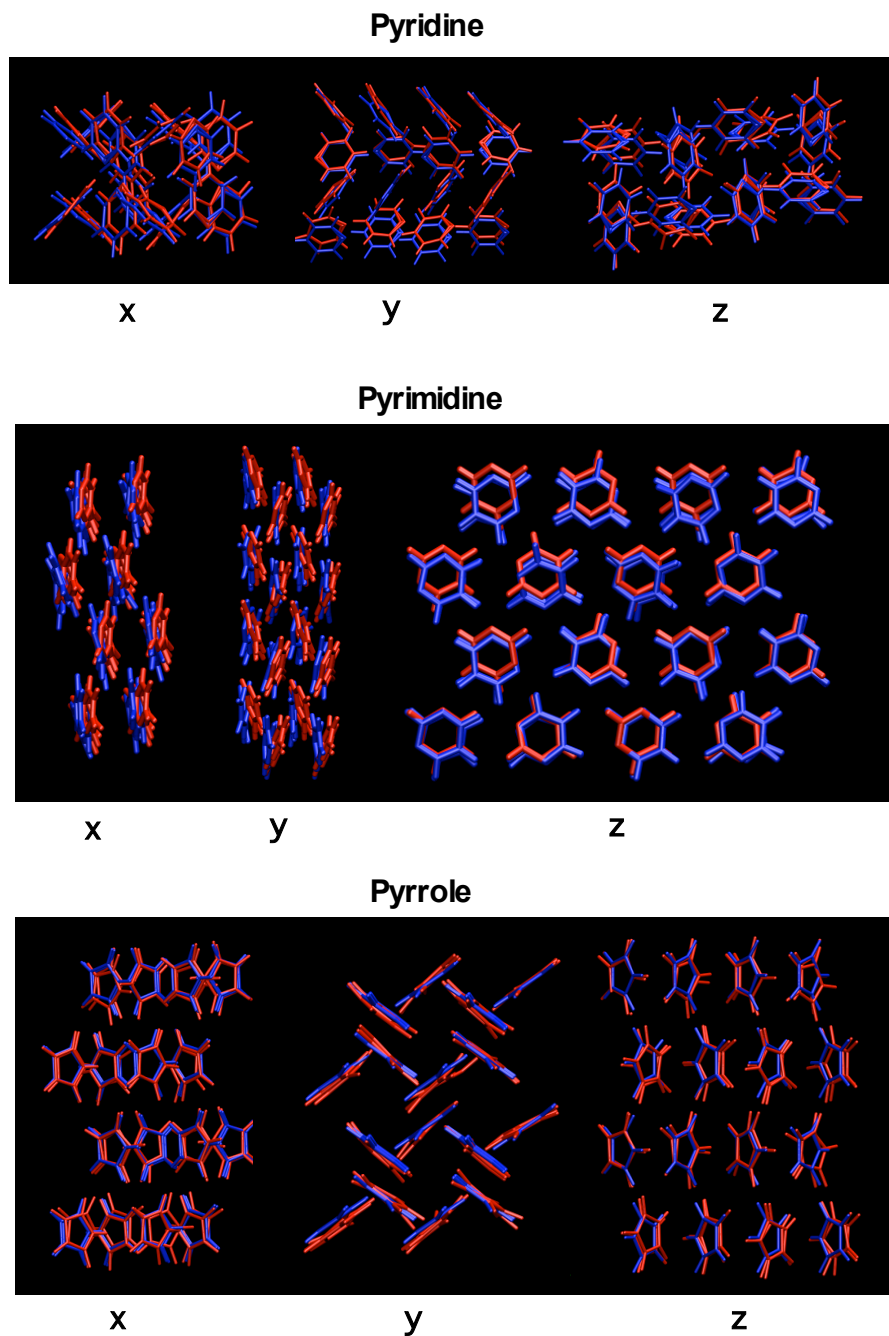

- (1) Mootz, D.; Wussow, H. G. *The Journal of Chemical Physics* **1981**, *75*, 1517.
- (2) Innes, K. K.; Ross, I. G.; Moomaw, W. R. *Journal Of Molecular Spectroscopy* **1988**, *132*, 492.
- (3) Furberg, S.; Groggaard, J.; Smedsrud, B. *Acta Chem. Scand B* **1979**.
- (4) Cradock, S.; Liescheski, P. B.; Rankin, D. W. H.; Robertson, H. E. *Journal Of The American Chemical Society* **1988**, *110*, 2758.
- (5) Goddard, R.; Heinemann, O.; Kruger, C. *Acta Crystallographica Section C* **1997**, *53*, 1846.
- (6) Nygaard, U.; Nielsen, J. T.; Kirchheiner, J.; Maltesen, G.; Rastrup-Andersen, J.; Sørensen, G. O. *Journal of Molecular Structure* **1969**, *3*, 491.
- (7) McMullan, R. K.; Epstein, J.; Ruble, J. R.; Craven, B. M. *Acta Crystallographica Section B* **1979**, *35*, 688.
- (8) Craven, B. M.; McMullan, R. K.; Bell, J. D.; Freeman, H. C. *Acta Crystallographica Section B* **1977**, *33*, 2585.
- (9) Blackman, G. L.; Brown, R. D.; Burden, F. R.; Elsum, I. R. *JOURNAL OF MOLECULAR SPECTROSCOPY* **1976**, *60*, 63.
